# Supplementary material for: A tryptophan-based copper(ii) coordination polymer: catalytic activity towards Suzuki–Miyaura cross-coupling reactions
Source: Royal Society of Chemistry journal article supplement (doi:10.1039/d1ce01282g), 2021-01-01
Supplement: d1ce01282g1.pdf [file d1ce01282g1.pdf]

## Supporting Information For the Manuscript

### Tryptophan based copper(II) coordination polymer: Catalytic activity towards Suzuki-Miyaura cross-coupling reaction†

Ahmad Husain,<sup>a\*</sup> Pooja Rani,<sup>b</sup> Kuldeep Kaur Nar,<sup>a</sup> Amit Pratap Singh,<sup>c</sup> Rakesh Kumar,<sup>d</sup> K. K. Bhasin,<sup>b</sup> Girijesh Kumar<sup>b\*</sup>

<sup>a</sup>Department of Chemistry, DAV University, Jalandhar-144012, Punjab, India. [E-mail: Ahmad Husain: ahmad.husain@outlook.com]

<sup>b</sup>Department of Chemistry & Centre for Advanced Studies in Chemistry, Panjab University Chandigarh, Chandigarh, India. [E-mail: gkumar@pu.ac.in]

<sup>c</sup>Department of Applied Sciences, National Institute of Technology, New Delhi-110040, India.

<sup>d</sup> Department of Chemistry, MCM DAV College, Kangra -176001, Himachal Pradesh, India.

| Table of content |                                                                                                                                                                                                                                                                                                                               | Page No. |
|------------------|-------------------------------------------------------------------------------------------------------------------------------------------------------------------------------------------------------------------------------------------------------------------------------------------------------------------------------|----------|
| <b>Fig. S1.</b>  | IR spectrum of <b>CP1</b> .                                                                                                                                                                                                                                                                                                   | 4        |
| <b>Fig. S2.</b>  | CHN data for <b>CP1</b> .                                                                                                                                                                                                                                                                                                     | 5        |
| <b>Fig. S3.</b>  | TGA plot for <b>CP1</b> .                                                                                                                                                                                                                                                                                                     | 6        |
| <b>Fig. S4.</b>  | X-band EPR spectrum of $[\text{Cu}(\text{L-trypr})(\text{azpy})_{1/2}(\text{H}_2\text{O})(\text{NO}_3)]_\infty$ ( <b>CP1</b> ).                                                                                                                                                                                               | 7        |
| <b>Fig. S5.</b>  | PXRD pattern for coordination polymer <b>CP1</b> , before (red trace) and after Suzuki-Miyaura cross coupling reaction of phenylboronic acid with Iodobenzene (blue trace) and their comparison with the simulated pattern obtained from the single crystal structure analysis of <b>CP1</b> (black trace) using Mercury 4.0. | 7        |
| <b>Fig. S6.</b>  | <sup>1</sup> H NMR spectrum of biphenyl, a product of Suzuki coupling of benzenboronic acid with Iodobenzene and bromobenzene using <b>CP1</b> as a catalyst in CDCl <sub>3</sub> . *Represents the solvent residual peak.                                                                                                    | 8        |
| <b>Fig. S7.</b>  | <sup>1</sup> H NMR spectrum of [1,1'-biphenyl]-3-amine, a product of Suzuki coupling of benzenboronic acid with 3-Iodoaniline using <b>CP1</b> as catalyst in CDCl <sub>3</sub> . *Represents the solvent residual peak.                                                                                                      | 9        |
| <b>Fig. S8.</b>  | <sup>1</sup> H NMR spectrum of 4'-methyl-[1,1'-biphenyl]-4-carbaldehyde, a product of Suzuki coupling of 4-Formylphenylboronic acid with 4-Iodotoulene using <b>CP1</b> as catalyst in CDCl <sub>3</sub> . *Represents the solvent residual peak.                                                                             | 10       |

- Fig. S9.**  $^1\text{H}$  NMR spectrum of 4'-methoxy-[1,1'-biphenyl]-4-carbaldehyde, a product of Suzuki coupling of 4-Formylphenylboronic acid with 4-Iodoanisole using **CP1** as catalyst in  $\text{CDCl}_3$ . \*Represents the solvent residual peak. 11
- Fig. S10.**  $^1\text{H}$  NMR spectrum of 2'-methoxy-[1,1'-biphenyl]-4-carbaldehyde, a product of Suzuki coupling of 4-Formylphenylboronic acid with 2-Iodoanisole using **CP1** as catalyst in  $\text{CDCl}_3$ . \*Represents the solvent residual peak. 12
- Fig. S11.**  $^1\text{H}$  NMR spectrum of [1,1'-biphenyl]-4-carbaldehyde, a product of Suzuki coupling of 4-Formylphenylboronic acid with Iodobenzene and Bromobenzene using **CP1** as catalyst in  $\text{CDCl}_3$ . \*Represents the solvent residual peak. 13
- Fig. S12.** HR mass spectrum of biphenyl, a product of Suzuki coupling of benzeneboronic acid with Iodobenzene and bromobenzene using **CP1** as catalyst. Calculated  $m/z$  is 154.0783, found  $m/z$  is  $[\text{M}+2] = 156.0513$ . 14
- Fig. S13.** HR mass spectrum of [1,1'-biphenyl]-3-amine, a product of Suzuki coupling of benzeneboronic acid with 3-Iodoaniline using **CP1** as catalyst. Calculated  $m/z$  is 169.0891, found  $m/z$  is 169.0886. 15
- Fig. S14.** HR mass spectrum of 4'-methyl-[1,1'-biphenyl]-4-carbaldehyde, a product of Suzuki coupling of 4-Formylphenylboronic acid with 4-Iodotoulene using **CP1** as catalyst. Calculated  $m/z$  is 196.0888, found  $m/z$  is  $[\text{M}+1] = 197.5785$ . 16
- Fig. S15.** HR mass spectrum of 4'-methoxy-[1,1'-biphenyl]-4-carbaldehyde, a product of Suzuki coupling of 4-Formylphenylboronic acid with 4-Iodoanisole using **CP1** as catalyst. Calculated  $m/z$  is 212.0837, found  $m/z$  is  $[\text{M}+1] = 213.0908$ . 17
- Fig. S16.** HR mass spectrum of 2'-methoxy-[1,1'-biphenyl]-4-carbaldehyde, a product of Suzuki coupling of 4-Formylphenylboronic acid with 2-Iodoanisole using **CP1** as catalyst. Calculated  $m/z$  is 212.0837, found  $m/z$  is  $[\text{M}+1] = 213.0914$  18
- Fig. S17.** HR mass spectrum of [1,1'-biphenyl]-4-carbaldehyde, a product of Suzuki coupling of 4-Formylphenylboronic acid with 2-Iodoanisole using **CP1** as catalyst. Calculated  $m/z$  is 182.0732, found  $m/z$  is  $[\text{M}+1] = 183.0809$  19
- Fig. S18.**  $^1\text{H}$  NMR spectrum of supernatant solution recovered after the Suzuki-Miyaura cross-coupling reactions of iodobenzene and phenylboronic acid in  $\text{CDCl}_3$  solvent (representative case). \*Represents the solvent residual peaks. The traces seen in the spectrum are assigned to the unreacted substrate (i.e. iodobenzene) and phenylboronic acid. 20

|                  |                                                                                                                                                                                               |    |
|------------------|-----------------------------------------------------------------------------------------------------------------------------------------------------------------------------------------------|----|
| <b>Fig. S19.</b> | Recyclability of <b>CP1</b> for five successive catalytic reactions.                                                                                                                          | 20 |
| <b>Fig. S20.</b> | HR mass spectrum of 1-(4-methoxyphenoxy)-2,2,6,6-tetramethylpiperidine, a radical adduct of 4-Iodoanisole using <b>CP1</b> as catalyst. Calculated $m/z$ is 263.1885, found $m/z$ is 263.0375 | 21 |
| <b>Table S1</b>  | Hydrogen bonds for <b>CP1</b> [distances in Å; angles in degrees].                                                                                                                            | 21 |
| <b>Table S2</b>  | These molecular sizes of all the aryl halides are calculated with the help of Chem 3D program and using the literature protocol.                                                              | 22 |
| <b>Table S3</b>  | A comparative list of various transition metal based salts and their complexes including <b>CP1</b> that have been used for Suzuki-Miyaura cross-coupling reactions.                          | 23 |
|                  | References                                                                                                                                                                                    | 24 |

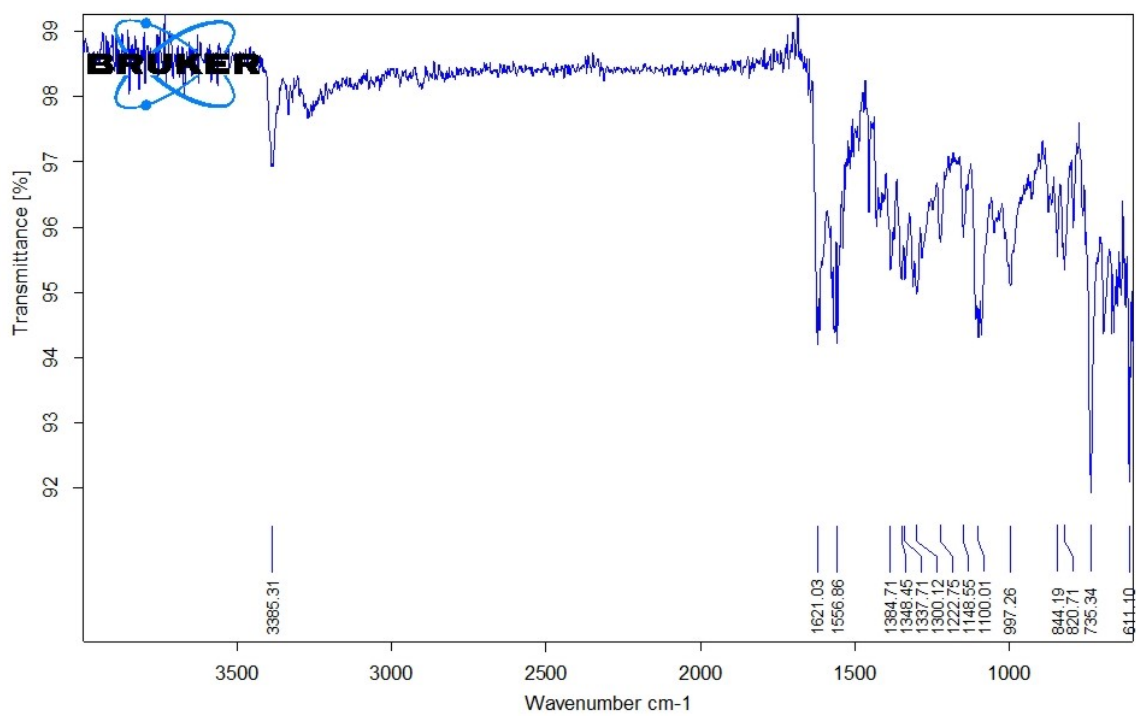

**Fig. S1.** IR spectrum of **CP1**.

FLASH EA 1112 SERIES CHN REPORT  
THERMO FINNIGAN

Method filename: C:\Program Files\Thermo Finnigan\Eager 300 for EA1112\DATA\Sys\_data\_ex  
Sample ID: KK8 (# 82)  
Analysis type: UnkNown  
Chromatogram filename: UNK-03072018-12.dat  
Sample weight: 1215

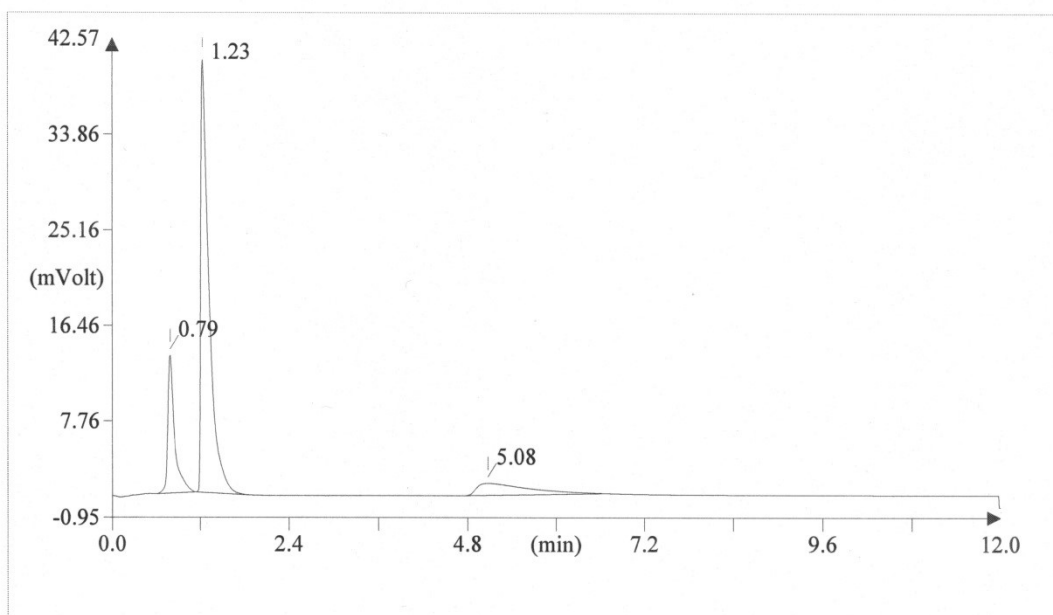

| Element Name | Element % | Ret. Time |
|--------------|-----------|-----------|
| Nitrogen     | 15.86     | 0.79      |
| Carbon       | 43.75     | 1.23      |
| Hydrogen     | 3.61      | 5.08      |

Fig. S2. CHN data for CP1.

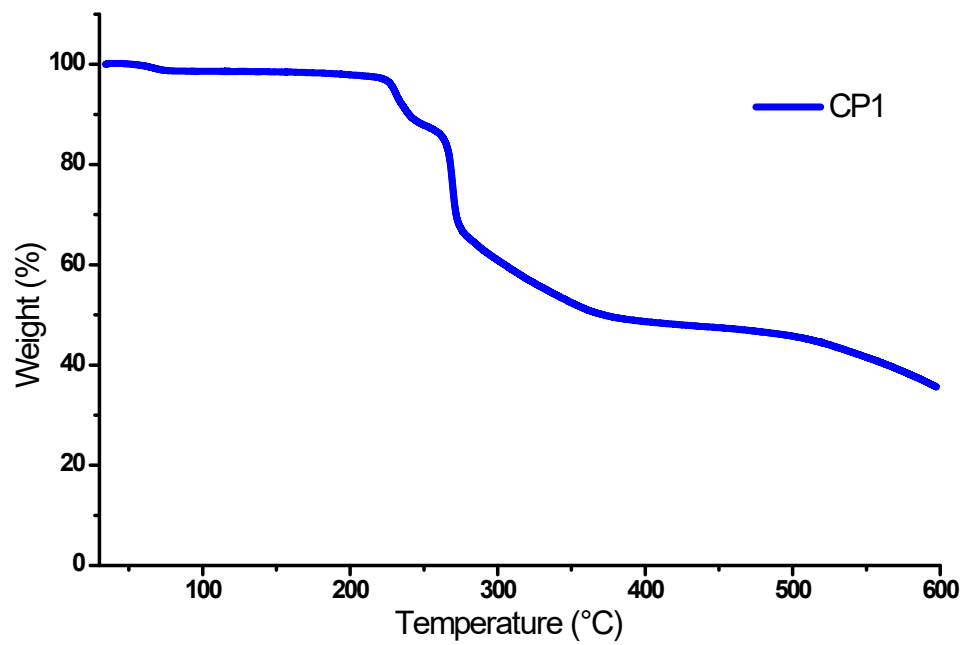

**Fig. S3.** TGA plot for **CP1**.

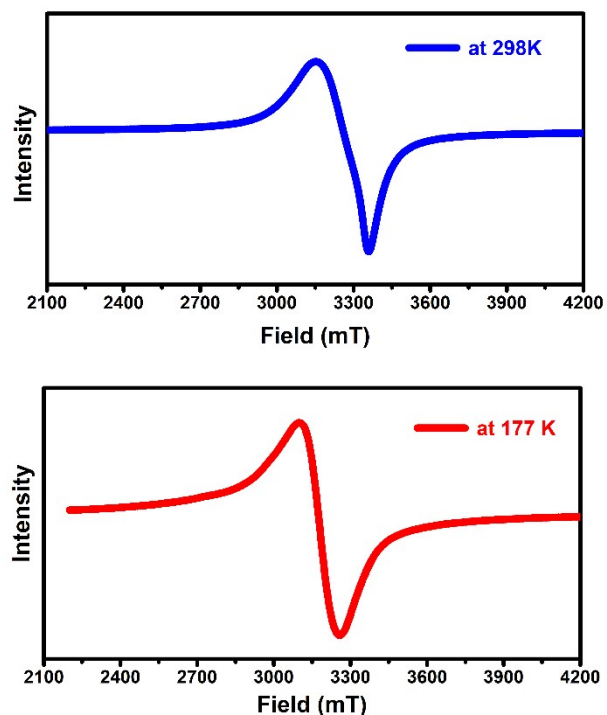

**Fig. S4.** X-band EPR spectrum of  $[\text{Cu}(\text{L-trypt})(\text{azpy})_{1/2}(\text{H}_2\text{O})(\text{NO}_3)]_{\infty}$  (**CP1**) at 298 K and at 177 K.

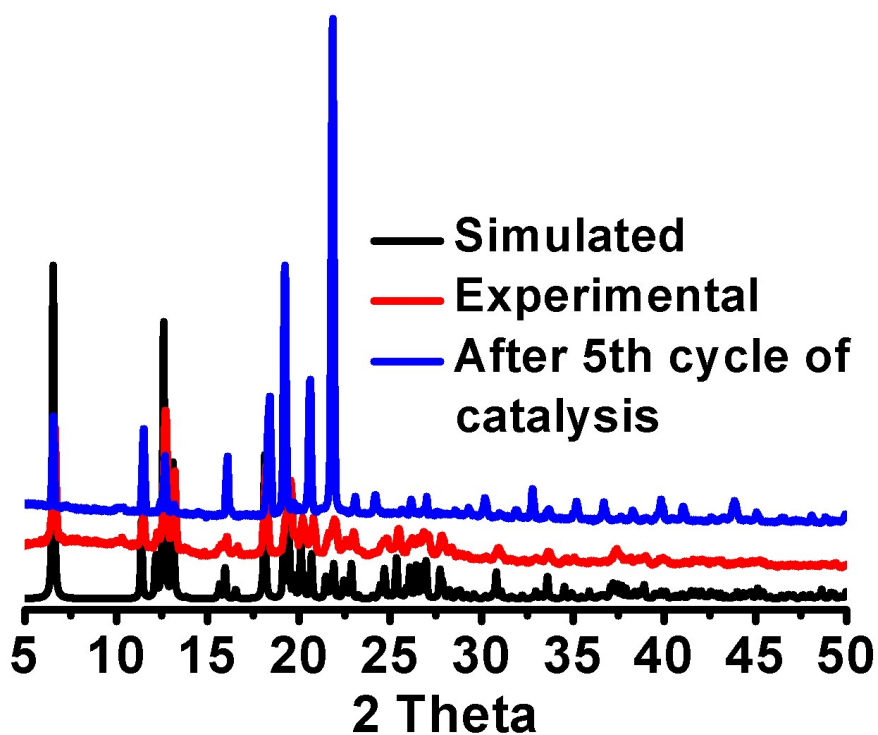

**Fig. S5.** PXRD pattern for coordination polymer **CP1**, before (red trace) and after Suzuki-Miyaura cross coupling reaction of phenylboronic acid with iodobenzene (blue trace) and their comparison with the simulated pattern obtained from the single crystal structure analysis of **CP1** (black trace) using Mercury 4.0.

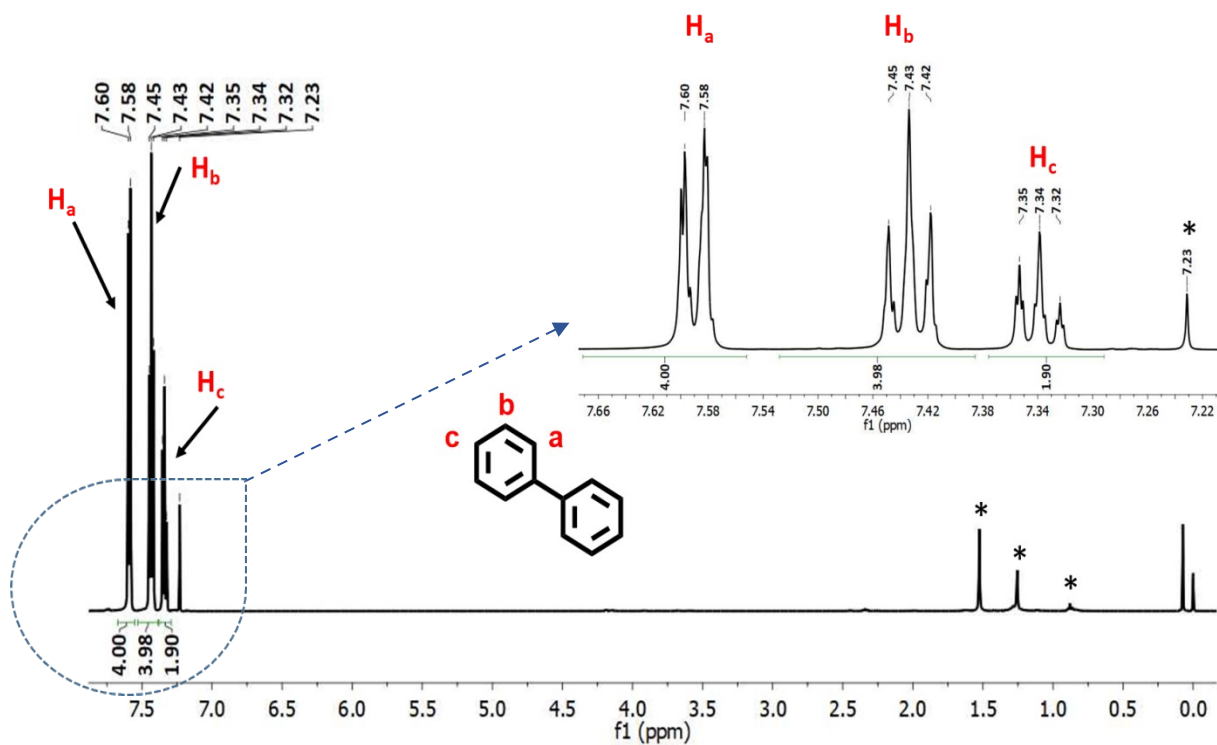

**Fig. S6.** <sup>1</sup>H NMR spectrum of biphenyl, a product of Suzuki coupling of benzeneboronic acid with iodobenzene and bromobenzene using **CP1** as catalyst in CDCl<sub>3</sub>. \*Represents the solvent residual peak.

<sup>1</sup>H NMR (500 MHz, CDCl<sub>3</sub>)  $\delta$  = 7.59 (dt,  $J$  = 8.1 Hz, 1.6 Hz, 4H, H<sub>a</sub>), 7.47 – 7.41 (m, 4H, H<sub>b</sub>), 7.37 – 7.31 (m, 2H, H<sub>c</sub>).



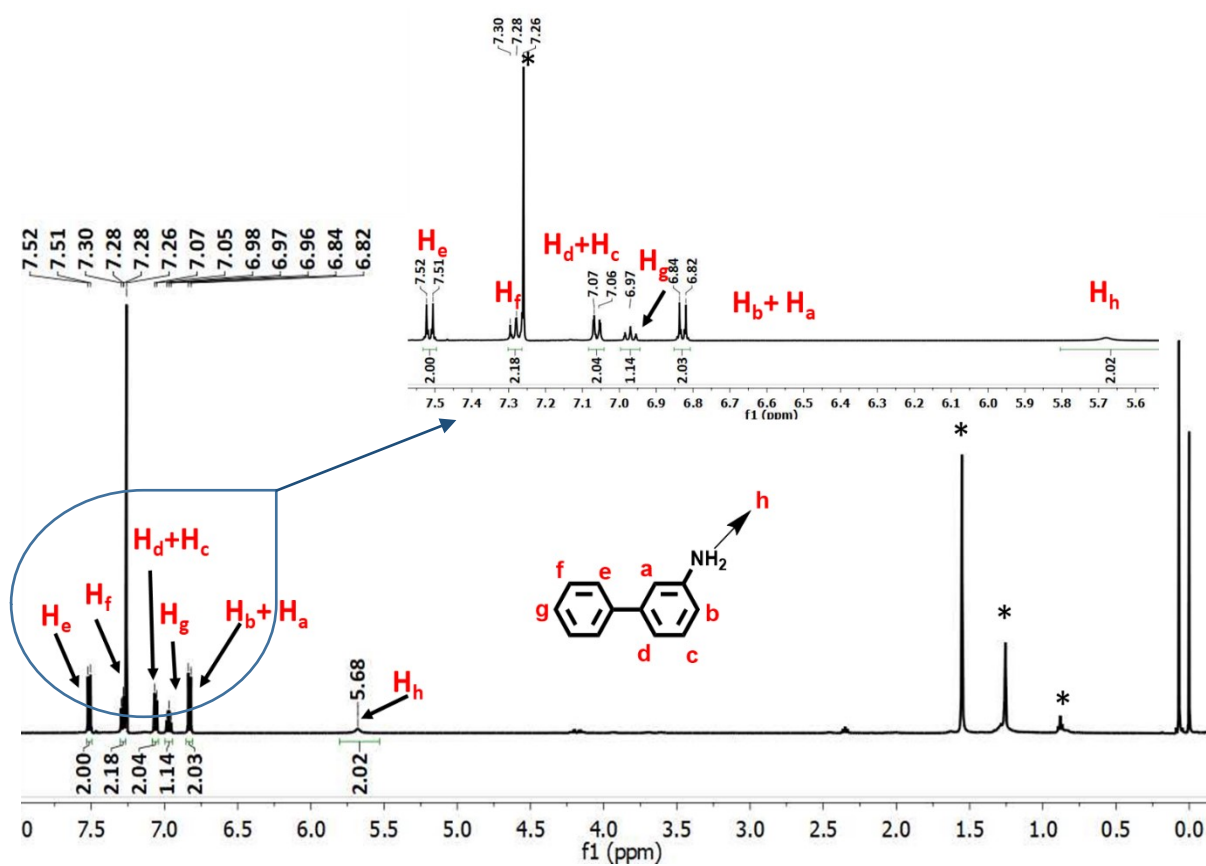

**Fig. S7.** <sup>1</sup>H NMR spectrum of [1,1'-biphenyl]-3-amine, a product of Suzuki coupling of benzeneboronic acid with 3-iodoaniline using **CP1** as catalyst in CDCl<sub>3</sub>. \*Represents the solvent residual peak.

<sup>1</sup>H NMR (500 MHz, CDCl<sub>3</sub>)  $\delta$  = 7.48 – 7.41 (m, 2H, H<sub>e</sub>), 7.25 – 7.20 (m, 2H, H<sub>f</sub>), 7.03 – 6.97 (m, 2H, H<sub>d</sub>+H<sub>c</sub>), 6.93 – 6.88 (m, 1H, H<sub>g</sub>), 6.78 – 6.73 (m, 2H, H<sub>b</sub>+H<sub>a</sub>), 5.61 (s, 2H).

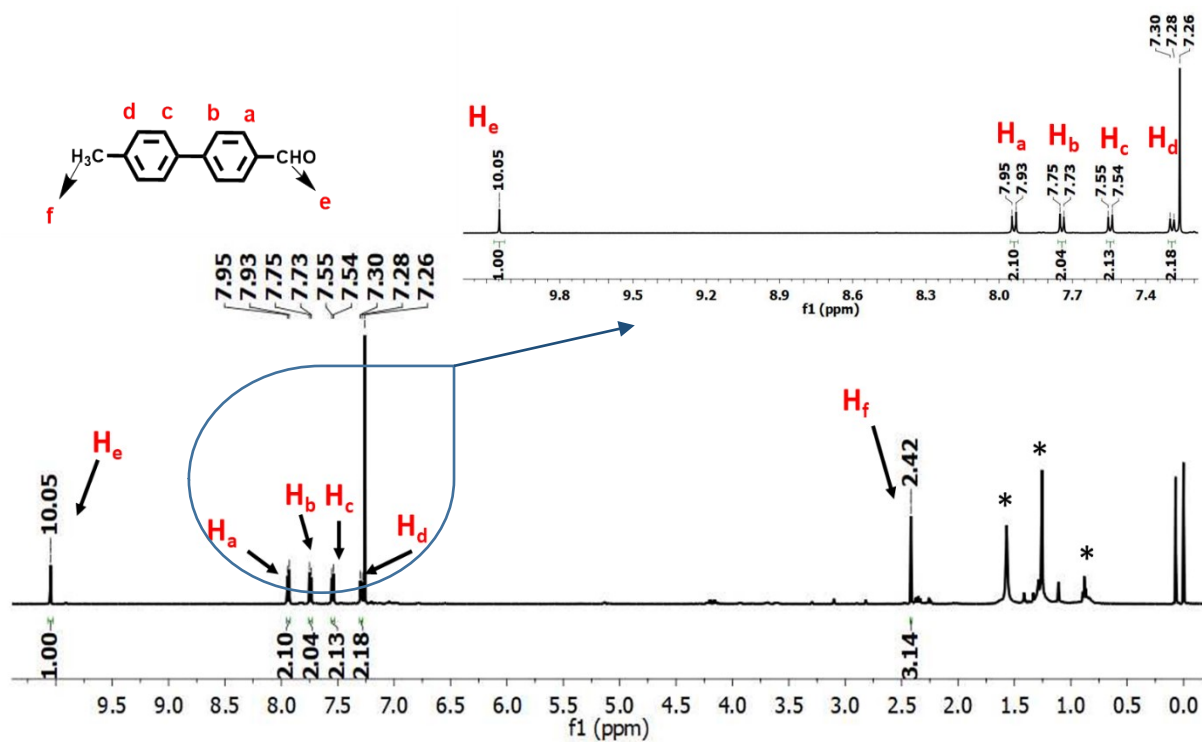

**Fig. S8.** <sup>1</sup>H NMR spectrum of 4'-methyl-[1,1'-biphenyl]-4-carbaldehyde, a product of Suzuki coupling of 4-formylphenylboronic acid with 4-iodotoluene using **CP1** as catalyst in CDCl<sub>3</sub>. \*Represents the solvent residual peak.

<sup>1</sup>H NMR (500 MHz, CDCl<sub>3</sub>) δ = 10.05 (s, 1H, H<sub>e</sub>), 7.94 (d, *J* = 8.4 Hz, 2H, H<sub>a</sub>), 7.74 (d, *J* = 8.2 Hz, 2H, H<sub>b</sub>), 7.54 (d, *J* = 8.2 Hz, 2H, H<sub>c</sub>), 7.29 (d, *J* = 7.9 Hz, 2H, H<sub>d</sub>), 2.42 (s, 3H, H<sub>f</sub>).

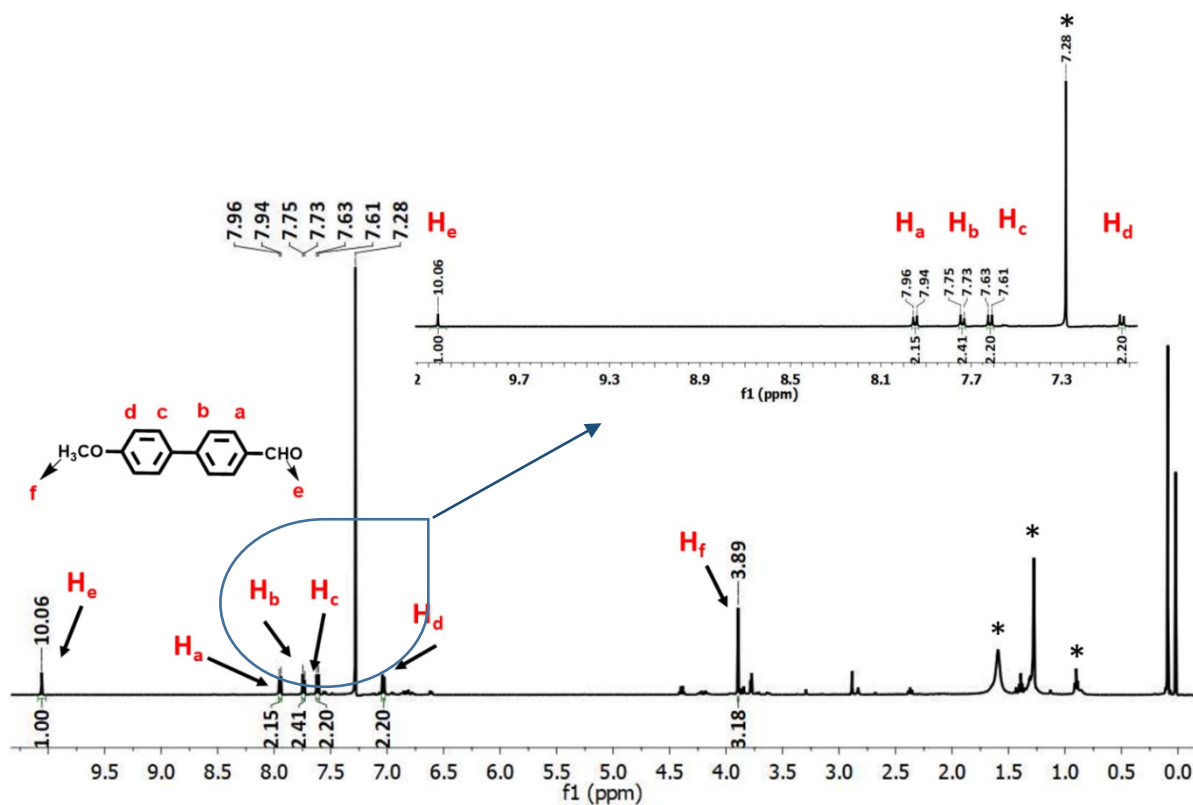

**Fig. S9.** <sup>1</sup>H NMR spectrum of 4'-methoxy-[1,1'-biphenyl]-4-carbaldehyde, a product of Suzuki coupling of 4-Formylphenylboronic acid with 4-Iodoanisole using **CP1** as catalyst in CDCl<sub>3</sub>. \*Represents the solvent residual peak.

<sup>1</sup>H NMR (500 MHz, CDCl<sub>3</sub>)  $\delta$  = 10.06 (s, 1H, H<sub>e</sub>), 7.95 (d,  $J$  = 8.4 Hz, 2H, H<sub>a</sub>), 7.74 (d,  $J$  = 8.2 Hz, 2H, H<sub>b</sub>), 7.62 (d,  $J$  = 8.8 Hz, 2H, H<sub>c</sub>), 7.08 – 6.99 (m, 3H, H<sub>d</sub>), 3.89 (s, 3H, H<sub>f</sub>).

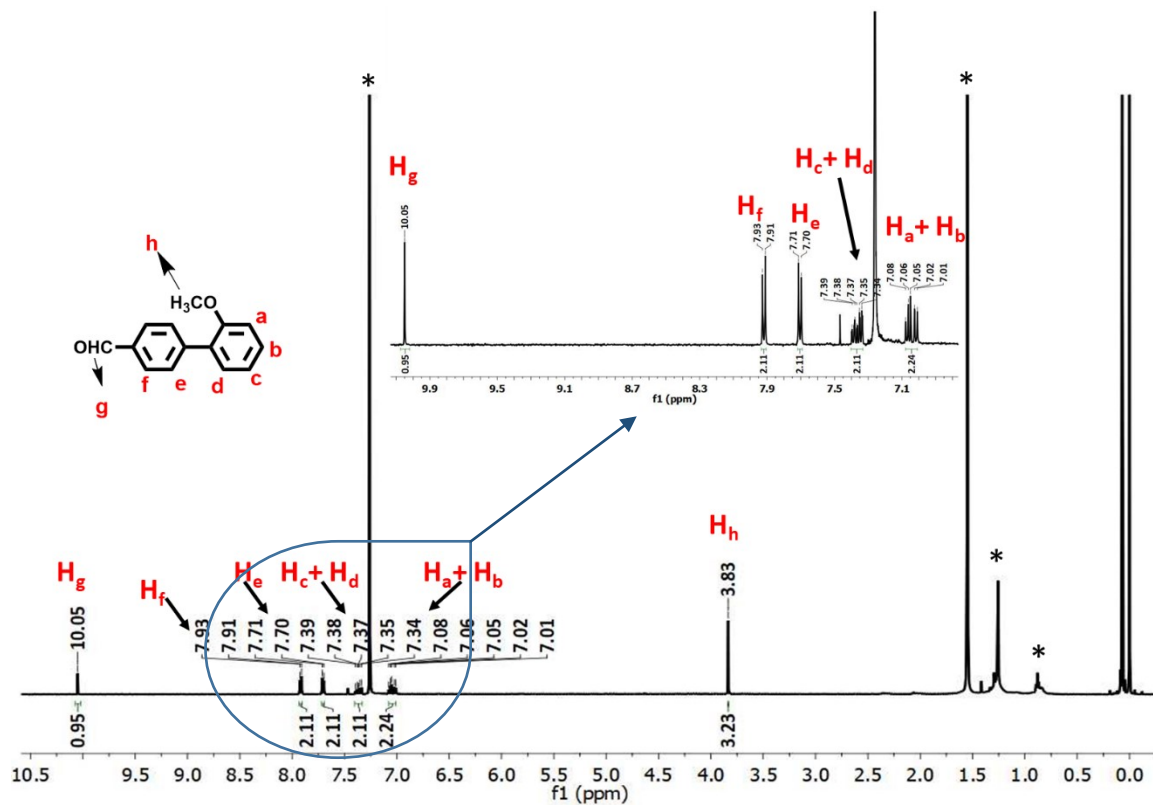

**Fig. S10.**  $^1\text{H}$  NMR spectrum of 2'-methoxy-[1,1'-biphenyl]-4-carbaldehyde, a product of Suzuki coupling of 4-formylphenylboronic acid with 2-Iodoanisole using **CP1** as catalyst in  $\text{CDCl}_3$ . \*Represents the solvent residual peak.

$^1\text{H}$  NMR (500 MHz,  $\text{CDCl}_3$ )  $\delta$  10.05 (s, 1H, H<sub>g</sub>), 7.92 (d,  $J = 8.4$  Hz, 2H, H<sub>f</sub>), 7.71 (d,  $J = 8.2$  Hz, 2H, H<sub>e</sub>), 7.41 – 7.30 (m, 2H, H<sub>c</sub>+H<sub>d</sub>), 7.12 – 6.97 (m, 2H, H<sub>a</sub>+H<sub>b</sub>), 3.83 (s, 3H, H<sub>h</sub>).

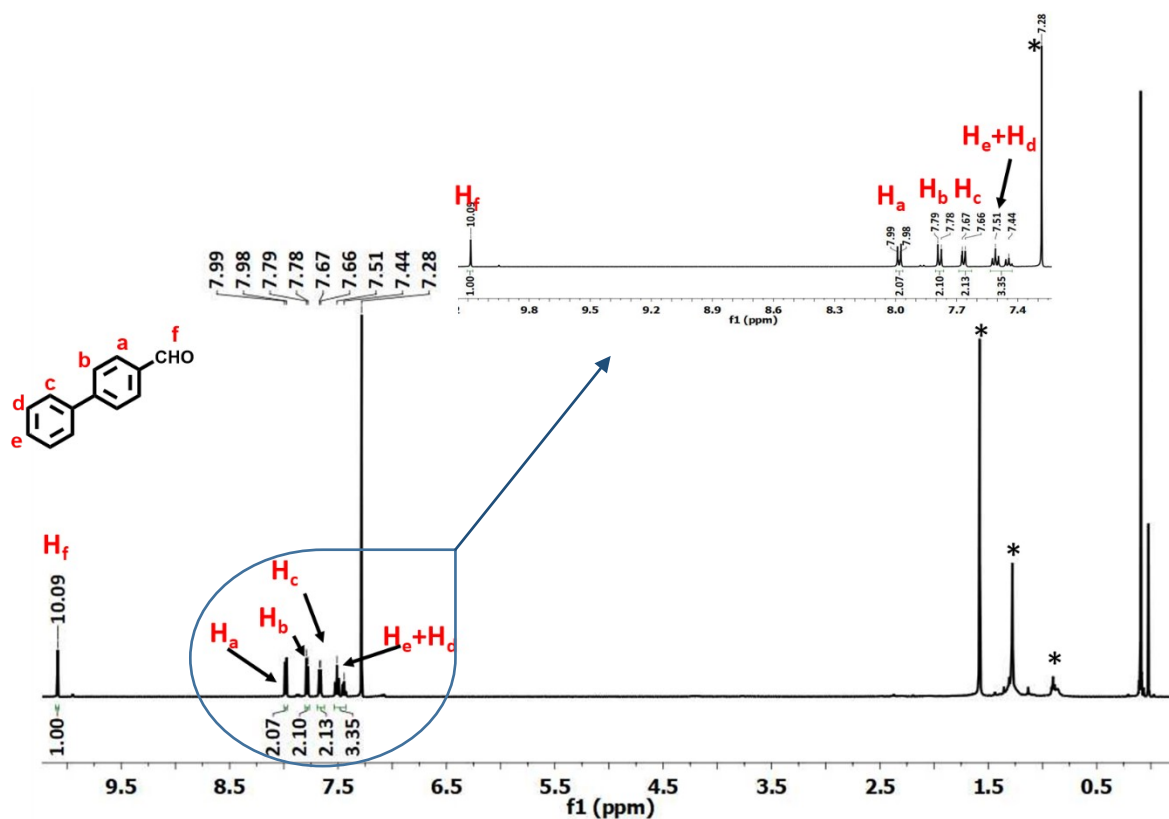

**Fig. S11.** <sup>1</sup>H NMR spectrum of [1,1'-biphenyl]-4-carbaldehyde, a product of Suzuki coupling of 4-formylphenylboronic acid with iodobenzene and bromobenzene using **CP1** as catalyst in CDCl<sub>3</sub>. \*Represents the solvent residual peak.

<sup>1</sup>H NMR (500 MHz, CDCl<sub>3</sub>) δ = 10.09 (s, 1H, H<sub>f</sub>), 7.99 (d, *J* = 8.1 Hz, 2H, H<sub>a</sub>), 7.78 (d, *J* = 8.2 Hz, 2H, H<sub>b</sub>), 7.67 (d, *J* = 7.0 Hz, 2H, H<sub>c</sub>), 7.48 (m, 3H, H<sub>d</sub>+H<sub>e</sub>).

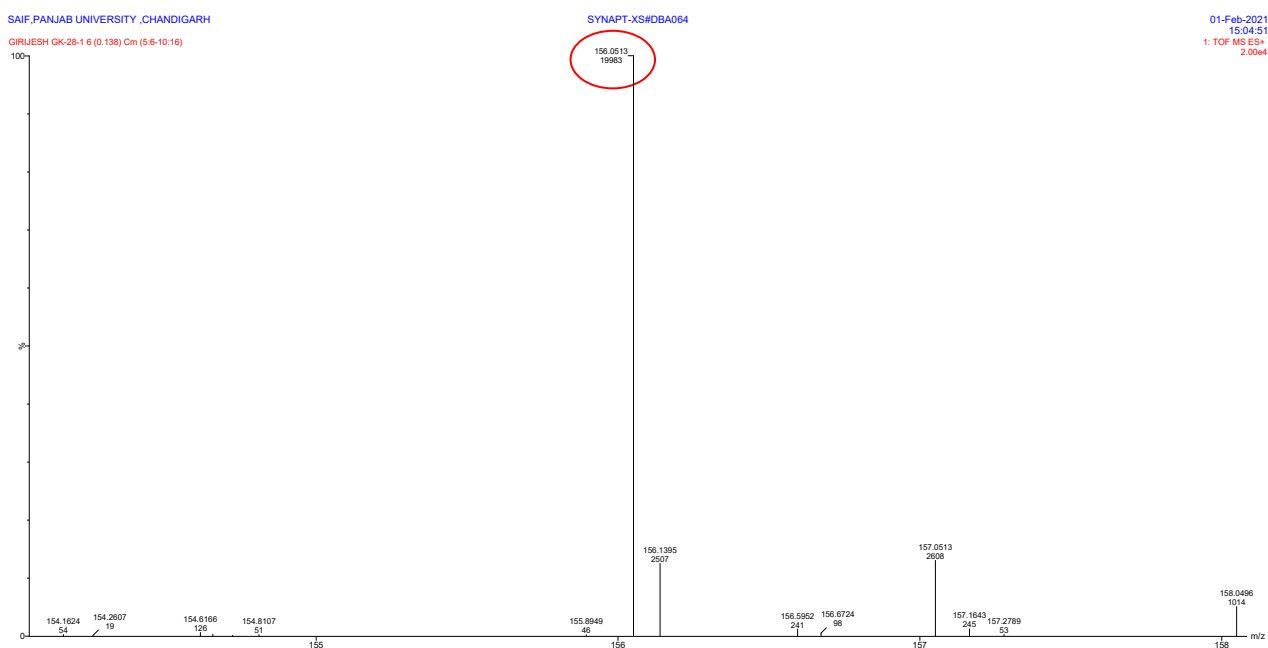

**Fig. S12.** HR mass spectrum of biphenyl, a product of Suzuki coupling of benzenboronic acid with Iodobenzene and bromobenzene using **CP1** as catalyst. Calculated  $m/z$  is 154.0783, found  $m/z$  is  $[M+2] = 156.0513$ .

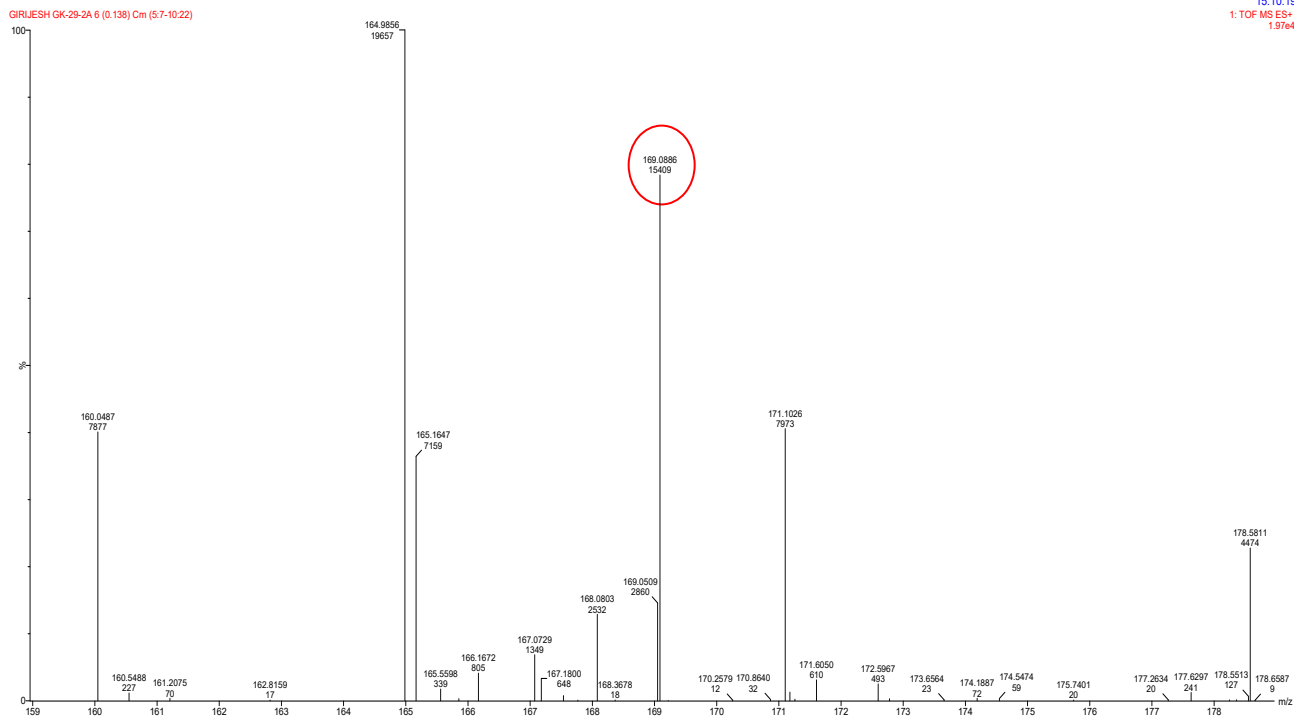

**Fig. S13.** HR mass spectrum of [1,1'-biphenyl]-3-amine, a product of Suzuki coupling of benzenboronic acid with 3-Iodoaniline using **CP1** as catalyst. Calculated  $m/z$  is 169.0891, found  $m/z$  is 169.0886.

WATERS,Q-TOF MICROMASS (ESI-MS)  
GIRIJESH GK-28-5 56 (1.039) Cm (1:56)

SAIF/CIL,PANJAB UNIVERSITY,CHANDIGARH  
TOF MS ES+  
3.91e3

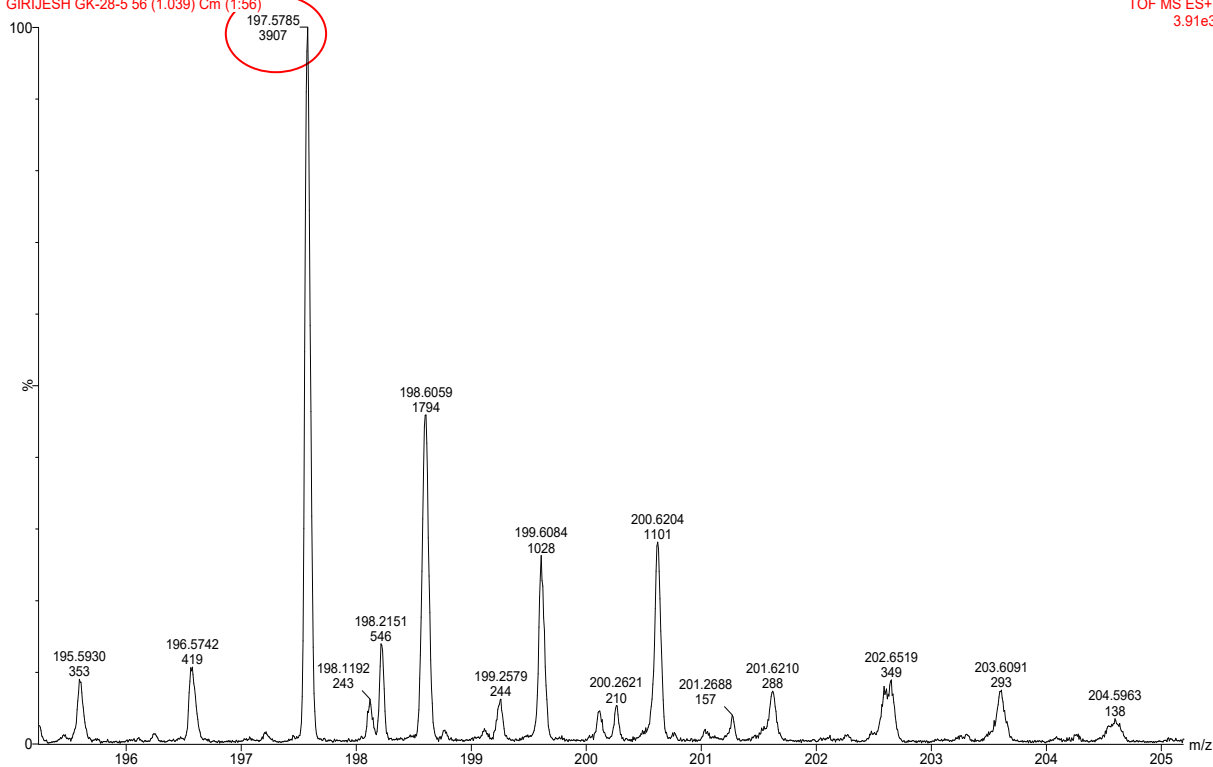

**Fig. S14.** HR mass spectrum of 4'-methyl-[1,1'-biphenyl]-4-carbaldehyde, a product of Suzuki coupling of 4-formylphenylboronic acid with 4-Iodotoulene using **CP1** as catalyst. Calculated  $m/z$  is 196.0888, found  $m/z$  is  $[M+1] = 197.5785$ .



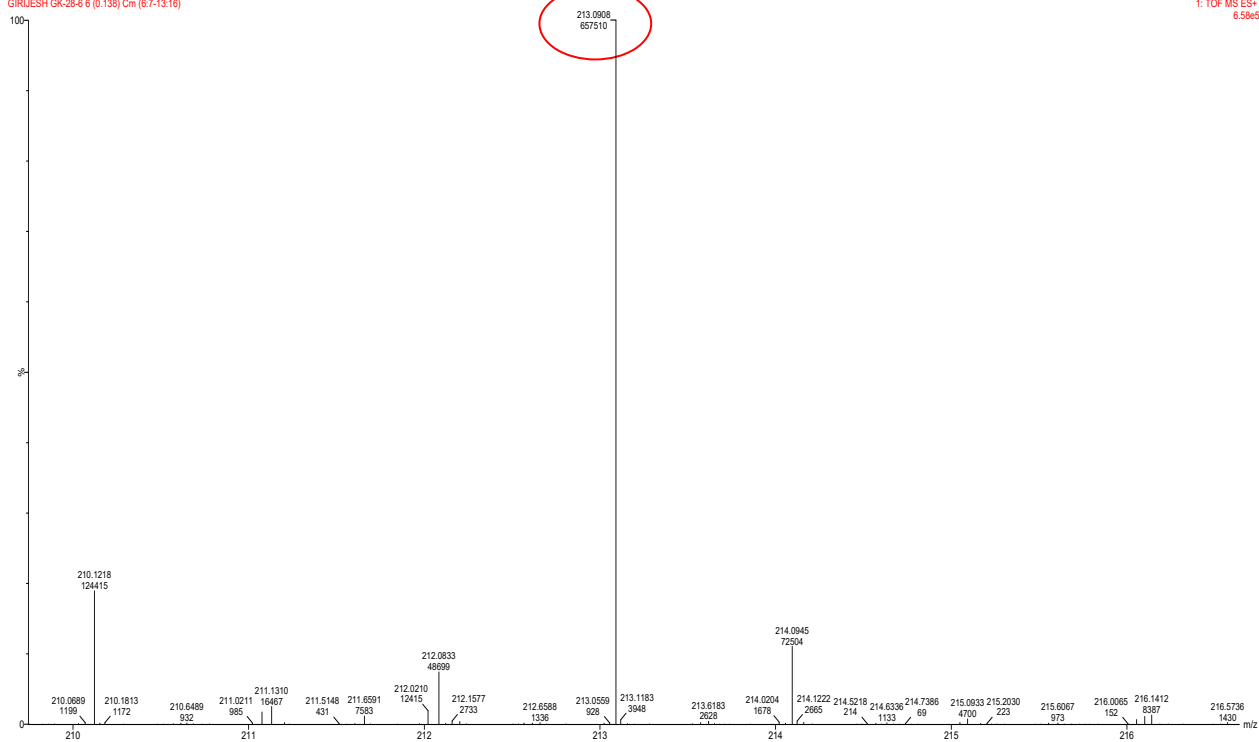

**Fig. S15.** HR mass spectrum of 4'-methoxy-[1,1'-biphenyl]-4-carbaldehyde, a product of Suzuki coupling of 4-formylphenylboronic acid with 4-Iodoanisole using **CP1** as catalyst. Calculated  $m/z$  is 212.0837, found  $m/z$  is  $[M+1] = 213.0908$ .

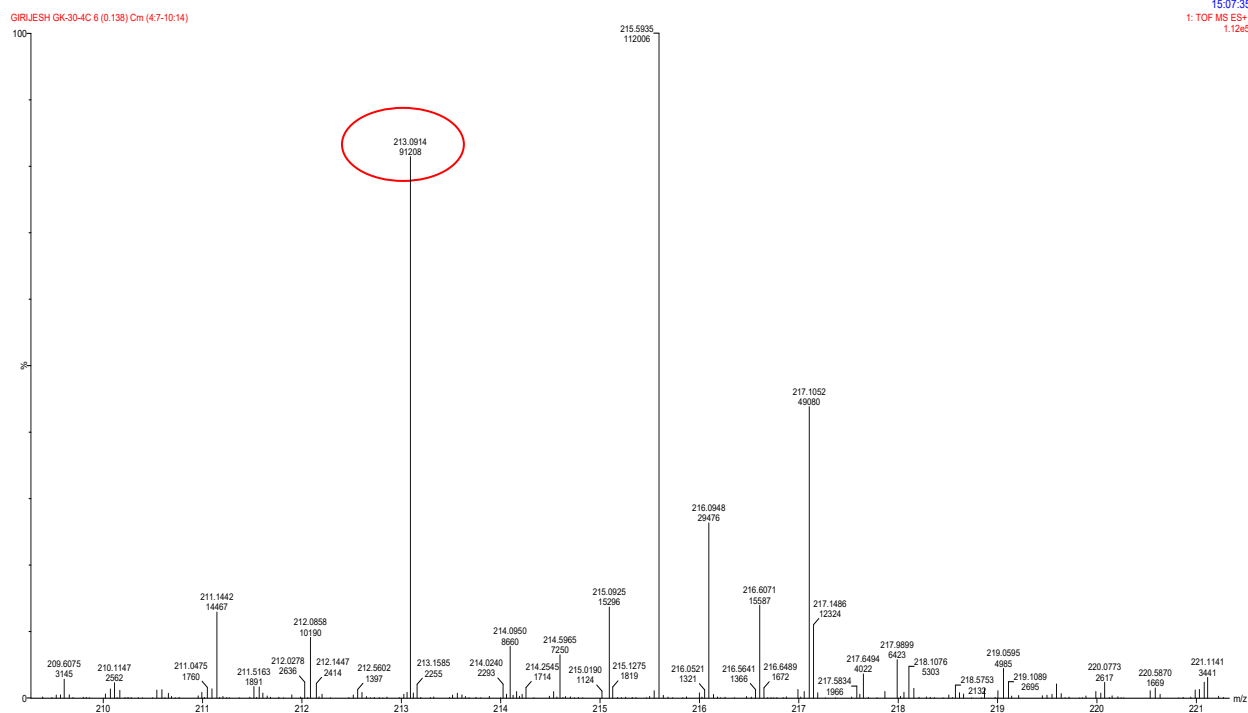

**Fig. S16.** HR mass spectrum of 2'-methoxy-[1,1'-biphenyl]-4-carbaldehyde, a product of Suzuki coupling of 4-formylphenylboronic acid with 2-Iodoanisole using **CP1** as catalyst. Calculated  $m/z$  is 212.0837, found  $m/z$  is  $[M+1] = 213.0914$ .

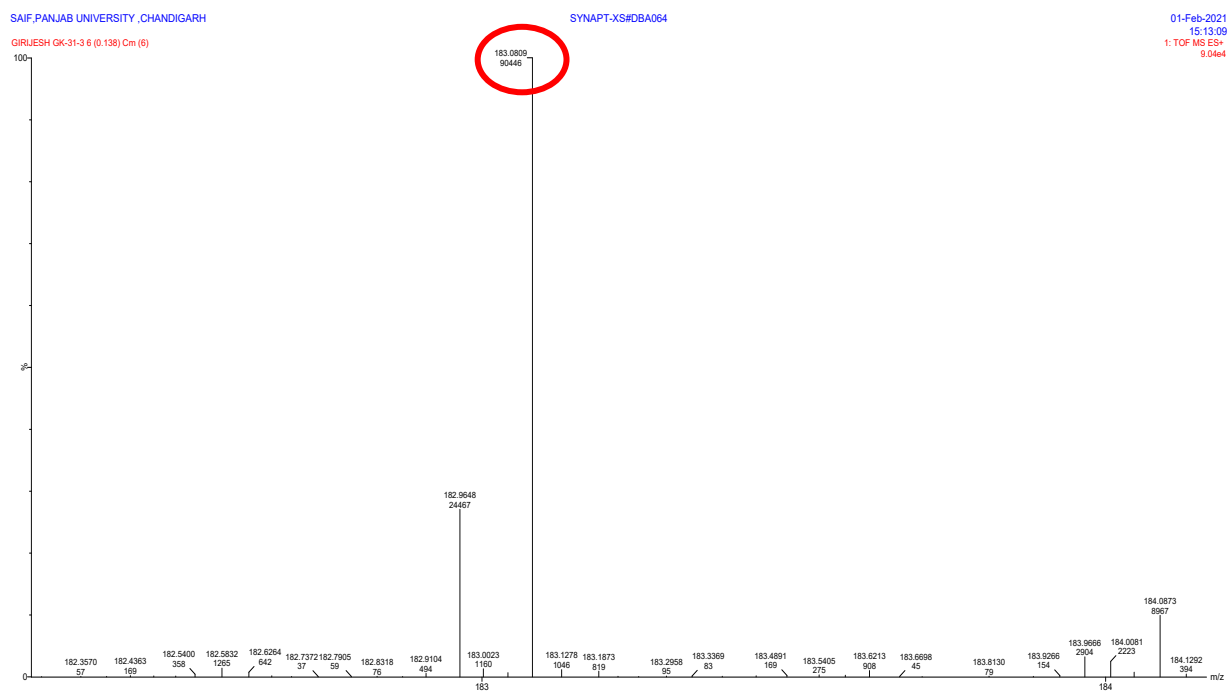

**Fig. S17.** HR mass spectrum of [1,1'-biphenyl]-4-carbaldehyde, a product of Suzuki coupling of 4-formylphenylboronic acid with 2-Iodoanisoole using **CP1** as catalyst. Calculated  $m/z$  is 182.0732, found  $m/z$  is  $[M+1] = 183.0809$ .

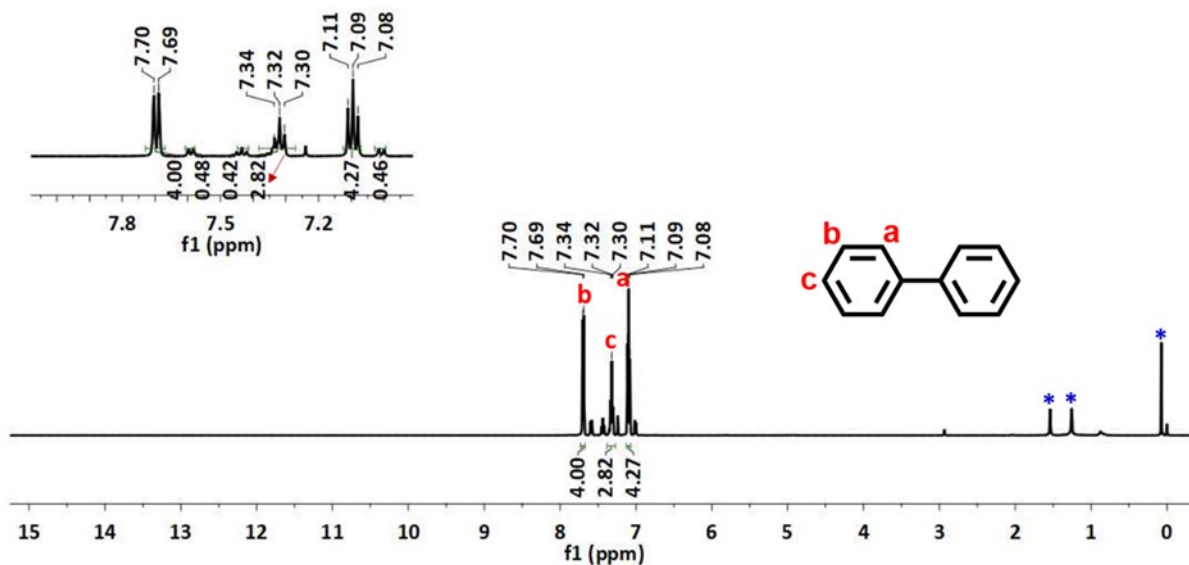

**Fig. S18.**  $^1\text{H}$  NMR spectrum of supernatant solution recovered after the Suzuki-Miyaura cross-coupling reactions of iodobenzene and phenylboronic acid in  $\text{CDCl}_3$  solvent (representative case). \*Represents the solvent residual peaks. The traces seen in the spectrum are assigned to the unreacted substrate (i.e. iodobenzene) and phenyl boronic acid.

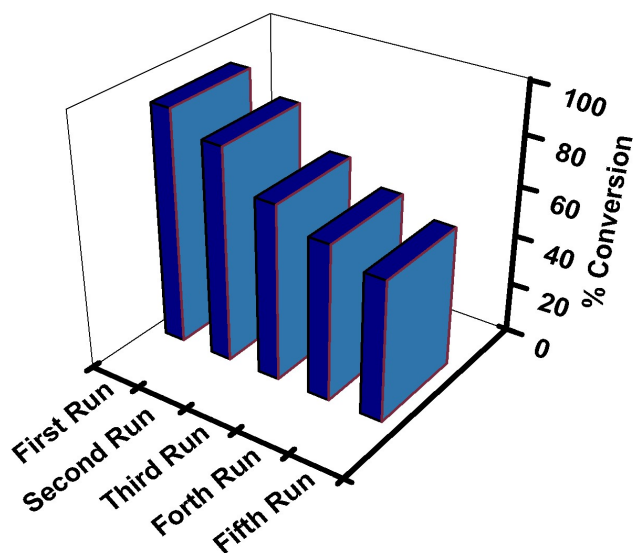

**Fig. S19.** Recyclability test of CP1 for the cross-coupling reaction between iodobenzene and phenylboronic acid (representative case).

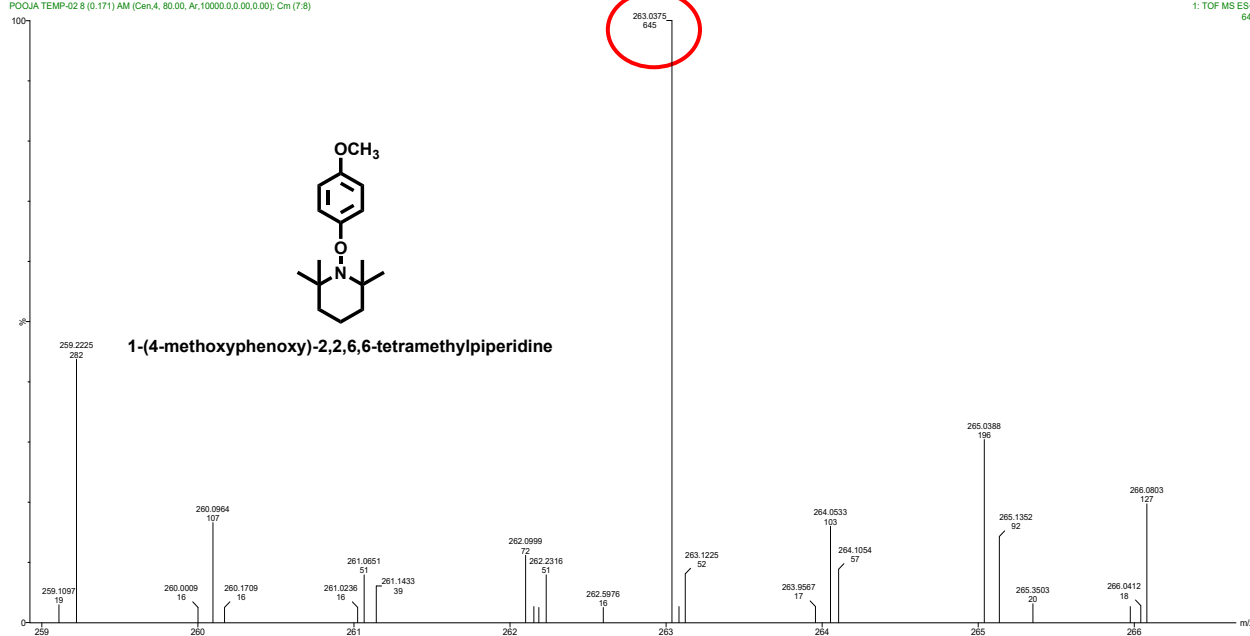

**Fig. S20.** HR mass spectrum of 1-(4-methoxyphenoxy)-2,2,6,6-tetramethylpiperidine, a radical adduct of 4-iodoanisole using **CP1** as catalyst. Calculated  $m/z$  is 263.1885, found  $m/z$  is 263.0375.

**Table S1.** Hydrogen bonds for **CP1** [distances in Å; angles in degrees].

| D-H...A [Å]               | d(H...A) [Å] | d(D...A) [Å] | <(DHA) [°] |
|---------------------------|--------------|--------------|------------|
| N1-H1A...O5 <sup>#1</sup> | 2.25         | 3.09(1)      | 158.4      |
| N1-H1B...O6 <sup>#3</sup> | 2.55         | 3.14(1)      | 124.5      |
| O3-H3A...O5 <sup>#5</sup> | 2.06         | 2.87(1)      | 159.0      |
| O3-H3B...O5 <sup>#8</sup> | 2.51         | 3.20(1)      | 138.2      |
| O3-H3B...O4 <sup>#8</sup> | 2.38         | 3.11(1)      | 142.4      |
| C5-H5...O6 <sup>#1</sup>  | 2.57         | 3.46(2)      | 160.3      |

Symmetry transformations used to generate equivalent atoms: #1: 1-X, -0.5+Y, 0.5-Z; #3: 0.5+X, +Y, 0.5-Z; #5: -X, -0.5+Y, 0.5-Z; #8: 0.5-X, -0.5+Y, +Z; #11: -0.5+X, +Y, 0.5-Z;

**Table S2.** These molecular sizes of all the aryl halides are calculated with the help of Chem 3D program and using the literature protocol.<sup>1-6</sup>

| S.No. | Substrates/ reagents                                                                | Molecular size                    | S.No. | Substrates/ reagents                                                                | Molecular size                    |
|-------|-------------------------------------------------------------------------------------|-----------------------------------|-------|-------------------------------------------------------------------------------------|-----------------------------------|
| 1.    | 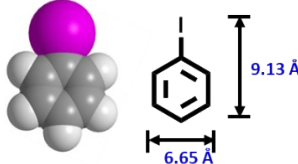   | $6.65 \times 9.13 \text{ \AA}^2$  | 6.    |   | $7.71 \times 9.13 \text{ \AA}^2$  |
| 2.    |    | $6.66 \times 8.73 \text{ \AA}^2$  | 7.    |   | $6.67 \times 10.44 \text{ \AA}^2$ |
| 3.    |    | $6.65 \times 10.07 \text{ \AA}^2$ | 8.    |   | $6.64 \times 7.58 \text{ \AA}^2$  |
| 4.    |   | $8.13 \times 9.57 \text{ \AA}^2$  | 9.    |  | $6.67 \times 10.63 \text{ \AA}^2$ |
| 5.    |  | $6.64 \times 11.32 \text{ \AA}^2$ |       |                                                                                     |                                   |

**Table S3.** A comparative list of various transition metal based salts and their complexes including **CP1** that have been used for Suzuki-Miyaura cross coupling reactions.

| Sr. No. | Complex                                                                                                                                                                                                                                                                                                                                                                  | Catalyst loading (mol%) | Temperature (°C) | Base                            | Solvent                   | Time (h) | Yield (%)        | Ref.         |
|---------|--------------------------------------------------------------------------------------------------------------------------------------------------------------------------------------------------------------------------------------------------------------------------------------------------------------------------------------------------------------------------|-------------------------|------------------|---------------------------------|---------------------------|----------|------------------|--------------|
| 1.      | [Cu(L-trypt)(azpy) <sub>1/2</sub> (H <sub>2</sub> O)NO <sub>3</sub> ] <sub>∞</sub> ( <b>1</b> )                                                                                                                                                                                                                                                                          | 2                       | 80               | NaOH                            | DMF                       | 8        | 98               | Present work |
| 2.      | CuCl <sub>2</sub> ( <b>2</b> )                                                                                                                                                                                                                                                                                                                                           | 10                      | 110              | K <sub>3</sub> PO <sub>4</sub>  | DMF                       | 24       | 94               | 7            |
| 3.      | PdNPs@Cu <sub>2</sub> (BDC) <sub>2</sub> DABCO ( <b>3</b> )                                                                                                                                                                                                                                                                                                              | 0.01                    | 25               | K <sub>2</sub> CO <sub>3</sub>  | H <sub>2</sub> O/<br>EtOH | 1        | 98               | 8            |
| 4.      | Ni <sub>2</sub> ( <sup>i</sup> Pr <sub>2</sub> Im) <sub>4</sub> (μ-COD) ( <b>4</b> )                                                                                                                                                                                                                                                                                     | 5                       | 100              | CsF                             | Toulene                   | 18       | 95               | 9            |
| 5.      | [Ni(Triaz <sup>NMe2</sup> -iPr)Cl]Cl ( <b>5</b> )                                                                                                                                                                                                                                                                                                                        | 2                       | 135              | t-BuOK                          | Toulene                   | 16       | 93               | 10           |
| 6.      | [Co(COOCH <sub>3</sub> ){C <sub>6</sub> H <sub>4</sub> -1-(NHPPH <sub>2</sub> )-3-(OPPh <sub>2</sub> )}] ( <b>6a</b> )<br>[Co(COOCH <sub>3</sub> ){C <sub>6</sub> H <sub>5</sub> -1,3-NHPPH <sub>2</sub> }] <sub>2</sub> ( <b>6b</b> )<br>[Co(COOCH <sub>3</sub> ) <sub>2</sub> {C <sub>5</sub> H <sub>3</sub> N-2,6-(NHPPH <sub>2</sub> ) <sub>2</sub> }] ( <b>6c</b> ) | 0.5/<br>0.5/<br>0.5     | 80               | Cs <sub>2</sub> CO <sub>3</sub> | CH <sub>3</sub> CN        | 16       | 50/<br>54/<br>56 | 11           |
| 7.      | Cu-BIA-Si-Fe <sub>3</sub> O <sub>4</sub> ( <b>7</b> )                                                                                                                                                                                                                                                                                                                    | 1.5                     | 80               | K <sub>2</sub> CO <sub>3</sub>  | DMSO                      | 2        | 95               | 12           |
| 8.      | CuI ( <b>8</b> )                                                                                                                                                                                                                                                                                                                                                         | 10                      | 80               | LiO <sup>t</sup> Bu             | HMPA                      | 48       | 90               | 13           |
| 9.      | CuO-L ( <b>9</b> )                                                                                                                                                                                                                                                                                                                                                       | 20                      | 130              | K <sub>2</sub> CO <sub>3</sub>  | DMF                       | 48       | 87               | 14           |
| 10.     | CuI ( <b>10</b> )                                                                                                                                                                                                                                                                                                                                                        | 10                      | 60               | LiO <sup>t</sup> Bu             | DMF                       | 12       | 87               | 15           |
| 11.     | Ni powder ( <b>11</b> )                                                                                                                                                                                                                                                                                                                                                  | 10                      | 110              | K <sub>2</sub> CO <sub>3</sub>  | PEG-400                   | 10       | 99               | 16           |

**Abbreviation:** L-trypt = L-Tryptophan; azpy = 4,4'-azopyridine; BDC = 1,4-benzenedicarboxylate; DABCO = 1,4-diazabicyclo [2.2.2] octane; NP = Nanoparticles; <sup>i</sup>Pr<sub>2</sub>Im = 1,3-bis(isopropyl)imidazolin-2-ylidene; COD = COD=1,5-cyclooctadiene; Triaz<sup>NMe2</sup>-iPr = N,N'-Bis(diisopropylphosphino)-N''-dimethyl-2,4,6-triaminotriazine; BIA = 2-(1H-benzo[d]imidazol-2-yl)aniline; L = 2,2'-diamino-6,6'-dimethylbiphenyl.

## References.

1. P. Rani, Gauri, A. Husain, K. K. Bhasin, and G. Kumar, *Cryst. Growth Des.*, 2020, **20**, 7141–7151.
2. G. Kumar and R. Gupta, *Inorg. Chem.*, 2013, **52**, 10773–10787.
3. G. Kumar and R. Gupta, *Inorg. Chem.*, 2012, **51**, 5497–5499.
4. J.-M. Gu, T.-H. Kwon, J.-H. Park and S. Huh, *Dalton Trans.*, 2010, **39**, 5608–5610.
5. J.-M. Gu, W.-S. Kim and S. Huh, *Dalton Trans.*, 2011, **40**, 10826–10829.
6. X.-M. Lin, T.-T. Li, L.-F. Chen, L. Zhang and C.-Y. Su, *Dalton Trans.*, 2012, **41**, 10422–10429.
7. G. Ranjani and R. Nagarajan, *Org. Lett.*, 2017, **19**, 3974–3977.
8. S. Tahmasebi, J. Mokhtari, M. R. Naimi-Jamal, A. Khosravia and L. Panahi, *J. Org. Chem.*, 2017, **853**, 35-41.
9. J. Zhou, J. H. J. Berthel, M. W. Kuntze-Fechner, A. Friedrich, T. B. Marder and U. Radius, *J. Org. Chem.*, 2016, **81**, 5789–5794.
10. M. Mastalir, B. Stöger, E. Pittenauer, G. Allmaier and K. Kirchner, *Org. Lett.*, 2016, **18**, 3186–3189.
11. L. M. Kumar and B. R. Bhat, *J. Organomet. Chem.*, 2017, **827**, 41-48.
12. L. Danqing, J. Ming, L. Li and M. Mohammadnia, *Appl. Organomet. Chem.*, 2020, **34**, 5820.
13. P. Basnet, S. Thapa, D. A. Dickie and R. Giri, *Chem. Commun.*, 2016, **52**, 11072–11075.
14. Y.-M. Ye, B.-B. Wang, D. Ma, L.-X. Shao and J.-M. Lu, *Catal. Lett.*, 2010, **139**, 141–144.
15. C.-T. Yang, Z.-Q. Zhang, Y.-C. Liu and L. Liu, *Angew. Chem. Int. Ed.*, 2011, **123**, 3990–3993.
16. C. S. Cho and N. T. Tran, *Cat. Commun.*, 2009, **11**, 191–195.

\*\*\*\*\*
